# Supplementary material for: IL-17 Producing Lymphocytes Cause Dry Eye and Corneal Disease With Aging in RXRα Mutant Mouse
Source: PubMed Central journal article supplement (PMC8983848; doi:10.3389/fmed.2022.849990), 2022-03-23
Supplement: Table_1.pdf [file Table_1.pdf]

**Supplemental Table 1: Antibodies in this study**

| Antibody Type | Target                         | Clone      | Host   | Reaction | Conjugation     | Company (Catalog No.)                                             | Dilution |
|---------------|--------------------------------|------------|--------|----------|-----------------|-------------------------------------------------------------------|----------|
| Primary       | CXCL16                         | 142417     | Rat    | Mouse    | None            | ThermoFisher (MA5-23869)                                          | 1:40     |
| Primary       | $\gamma\delta$ T-Cell Receptor | GL3        | Ham    | Mouse    | FITC            | BD (553177)                                                       | 1:30     |
| Primary       | ROR $\gamma$ t                 | Q31-378    | Mouse  | Mouse    | PE              | BD (562607)                                                       | 1:30     |
| Primary       | IL-17A                         | TC11-18H10 | Rat    | Mouse    | PE              | BD (559502)                                                       | 1:30     |
| Primary       | Cytokeratin 13 (KRT13)         | CK-13      | Rabbit | Mouse    | None            | ABclonal (A0411)                                                  | 1:40     |
| Primary       | SPRR2                          | Polyclonal | Rabbit | Mouse    | None            | ABclonal (Custom-made using 'KCPEPCPPPCKCPQPCP' peptide sequence) | 1:40     |
| Secondary     | IgG (H+L)                      | Polyclonal | Goat   | Rat      | Alexa Fluor 488 | Jackson ImmunoResearch (112-546-143)                              | 1:1000   |
| Secondary     | IgG (H+L)                      | Polyclonal | Goat   | Rabbit   | Alexa Fluor 488 | Jackson ImmunoResearch (111-545-003)                              | 1:1000   |
| Secondary     | IgG (H+L)                      | Polyclonal | Goat   | Rabbit   | Alexa Fluor 594 | Jackson ImmunoResearch (111-585-003)                              | 1:1000   |

Proteintech, Rosemont, IL; ThermoFisher Scientific, Waltham, MA; Abcam, Waltham, MA

Abclonal, Woburn, MA; Becton Dickinson (BD), San Diego, CA; R&D Systems, Minneapolis, MN

Jackson ImmunoResearch, West Grove, PA; Ham = hamster
