# Supplementary material for: IL-17 Producing Lymphocytes Cause Dry Eye and Corneal Disease With Aging in RXRα Mutant Mouse
Source: PubMed Central journal article supplement (PMC8983848; doi:10.3389/fmed.2022.849990), 2022-03-23
Supplement: Table_2.pdf [file Table_2.pdf]

Supplemental Table 2. Top differentially expressed genes in cell clusters

| Cluster | Name                                 | Top 20 genes of each cluster                                                                                                                     |
|---------|--------------------------------------|--------------------------------------------------------------------------------------------------------------------------------------------------|
| 0       | MΦMHCII <sup>low</sup>               | Serpib2, F5, Alox15, Basp1, Gadd45a, Ccl6, Cd24a, Rflnb, Ccl9, Tgm2, Irf2bp2, Cyp4f18, Vegfa, P2ry10, Arpc5, Plac8, Kctd12, Dnajb6, Thbs1, Itgam |
| 1       | Neutrophils-<br>LCN2 <sup>low</sup>  | Il1r2, Ifitm1, Tnfaip2, Nlrp3, Marcksl1, Csf3r, Ccr12, Trem1, Clec4d, Clec4e, S100a8, Clec4n, S100a9, Il1b, Hdc, Resf1, Cd14, Acod1, C5ar1, Lrg1 |
| 2       | γδ-T                                 | Il17a, Trdc, Cxcr6, Areg, Cd163l1, Tcrg-C1, Icos, Cd3g, Rora, Emb<br>Cd3e, Trdv4, Blk, Ikzf3, Pcd1, Il7r, Nrip1, Thy1, Cd3d, Tnfrsf9             |
| 3       | Monocytes                            | Apoe, Lyz2, Mafb, Lgmn, Selenop, Ms4a6c, C1qa, F13a1, Chil3, Ctss, C1qb, Ctsc, Ifi207, Ifitm3, Ctsb, Mrc1, Ifi27l2a, Ccr2, Ly86, C1qc,           |
| 4       | MΦ                                   | Cd209a, Tnip3, Cd74, H2-Ab1, H2-Eb1, H2-Aa, Gm26917, Mgl2, Mt1, Cd83, Ifi30, Mt2, Etv3, Clec10a, H2-DMb1, H2-DMa, Syng2, Sdc4, Ccnd1,<br>Crip1   |
| 5       | ILC2                                 | Il5, Gata3, Areg, Csf2, Rora, Lmo4, Ccl1, Nrip1, Furin, Itk, Il13, Il2ra,<br>Inpp4b, Tmem64, Calca, Ctla2a, Arg1, Hs3st1, Uhrf2, Il7r            |
| 6       | NK cells                             | Gzma, Ccl5, AW112010, Nkg7, Irf8, Klra4, Il2rb, Prf1, Serpinb9, Klra8, Eomes, Gzmb, Ugcg, Klre1, Serpinb6b, Sh2d2a, Spry2, Ms4a4b, Txk, Klra9    |
| 7       | CD4 <sup>+</sup> T cells             | Cd28, Icos, Trac, Ets1, Rora, S1pr1, Ctla4, Thy1, Uhrf2, Il18r1, Trbc2, Ms4a4b, Ptpn22, Il7r, Trbc1, Emb, Tcf7, Lat, Ramp3, Cd3d                 |
| 8       | Neutrophils-<br>LCN2 <sup>high</sup> | S100a9, S100a8, Lcn2, Stfa2l1, Wfdc21, Slfn4, Cstdc4, Lrg1, Hp, Clec4d, Sipi, Csf3r, Trem1, Acod1, Cxcr2, Hdc, Msrb1, Grina, Isg15,<br>Oasl2     |
| 9       | cDC2-<br>Retnla <sup>high</sup>      | Lpl, Retnla, Fn1, Lyz1, Fcrls, Ear2, Mt1, Pltp, Mt2, Lyz2, Cd74, Mgl2, H2-DMa, Crip1, H2-DMb1, H2-Ab1, Tnip3, Flrt3, Sdc3,<br>H2-Eb1             |

|    |                          |                                                                                                                                                     |
|----|--------------------------|-----------------------------------------------------------------------------------------------------------------------------------------------------|
| 10 | CD8 <sup>+</sup> T cells | Ccl5, Xcl1, Il2rb, Ms4a4b, Gimap4, Trbc2, Ctsw, Serpinb6b, Klrc1, Nkg7, Gimap3, Ptpn22, Cd28, Ly6c2, AW112010, Klrk1, Ctla2a, Serpinb9, Txk, Ets1   |
| 11 | B cells                  | Igkc, Cd79a, Ebf1, Ighm, Ighd, Scd1, Ms4a1, Cd79b, Mef2c, Ly6d, Pax5, H2-Ob, Satb1, Ccr7, Fcmr, Fcer2a, Ralgps2, Cd19, Cd55, H2-DMb2                |
| 12 | cDC1                     | Cst3, Naaa, Wdfy4, Ppt1, H2-Ab1, H2-Eb1, 44442, Rab7b, H2-Aa, Plbd1, H2afz, Ifi205, Tmsb10, Cd74, Naga, Irf8, Mpeg1, Trim35, Eef1b2, Atpif1         |
| 13 | Proliferating cell       | Stmn1, Tubb5, Ighm, Top2a, Pclaf, Tuba1b, Mki67, Ube2c, H2afz, Hmgb2, H2afv, Birc5, Hist1h2ap, Anp32b, Dek, Tmsb10, Hist1h1b, Crip1, Nucks1, Hmgb1  |
| 14 | Mast cells               | Mcpt4, Cpa3, Cma1, Tpsb2, Mrgprb1, Jun, Serpinb1a, Kit, Egr1, Slc18a2, Gata2, Ccl2, Mrgprb2, Ube2v2, Cyp11a1, Tpsab1, Vwa5a, Fcer1a, Ccl7, Hs6st2   |
| 15 | Treg cells               | Ctla4, Tnfrsf4, Ikzf2, Il2ra, Icos, Hopx, Odc1, Cpm, Trac, Foxp3, Tnfrsf9, Rora, Cd2, Tnfrsf18, Cd28, Maf, Trp53inp1, Gata3, Ets1, Trbc2            |
| 16 | Naive CD4 <sup>+</sup>   | Satb1, S1pr1, Dusp10, Lef1, Ccr7, Ms4a4b, Gimap3, Gramd3, Tcf7, Trbc2, Gimap6, Ablim1, Rpl12, Bcl2, Il7r, Ets1, Txk, Ms4a6b, Rps20, Trib2           |
| 17 | Migratory DC (mDC)       | Ccr7, Ccl22, Fscn1, Tbc1d4, Fabp5, Apol7c, Il4i1, Clic4, Cxcl16, Ccl17, Clu, Tmem123, Ifi30, Serpinb9, Tspan3, Nrp2, Socs2, Ccl5, Cacnb3, Serpinb6b |
| 18 | Plasmacytoid DC (pDC)    | Siglech, Tcf4, Bst2, Ccr9, Ly6d, Klk1, Irf8, Ly6c2, Spib, Atp1b1, Lair1, Cox6a2, Lrp8, Ctsl, Cyb561a3, Bcl11a, Rpl31, Runx2, Grn, Mpeg1             |
|    |                          |                                                                                                                                                     |
